# Supplementary material for: Five-gene signature predicts acute kidney injury in early kidney transplant patients
Source: Aging (Albany NY). 2022 Mar 23;14(6):2628–44. doi: 10.18632/aging.203962 (PMC9004575; doi:10.18632/aging.203962)
Supplement: Supplementary Figures [file aging-14-203962-s001.pdf]

SUPPLEMENTARY FIGURES

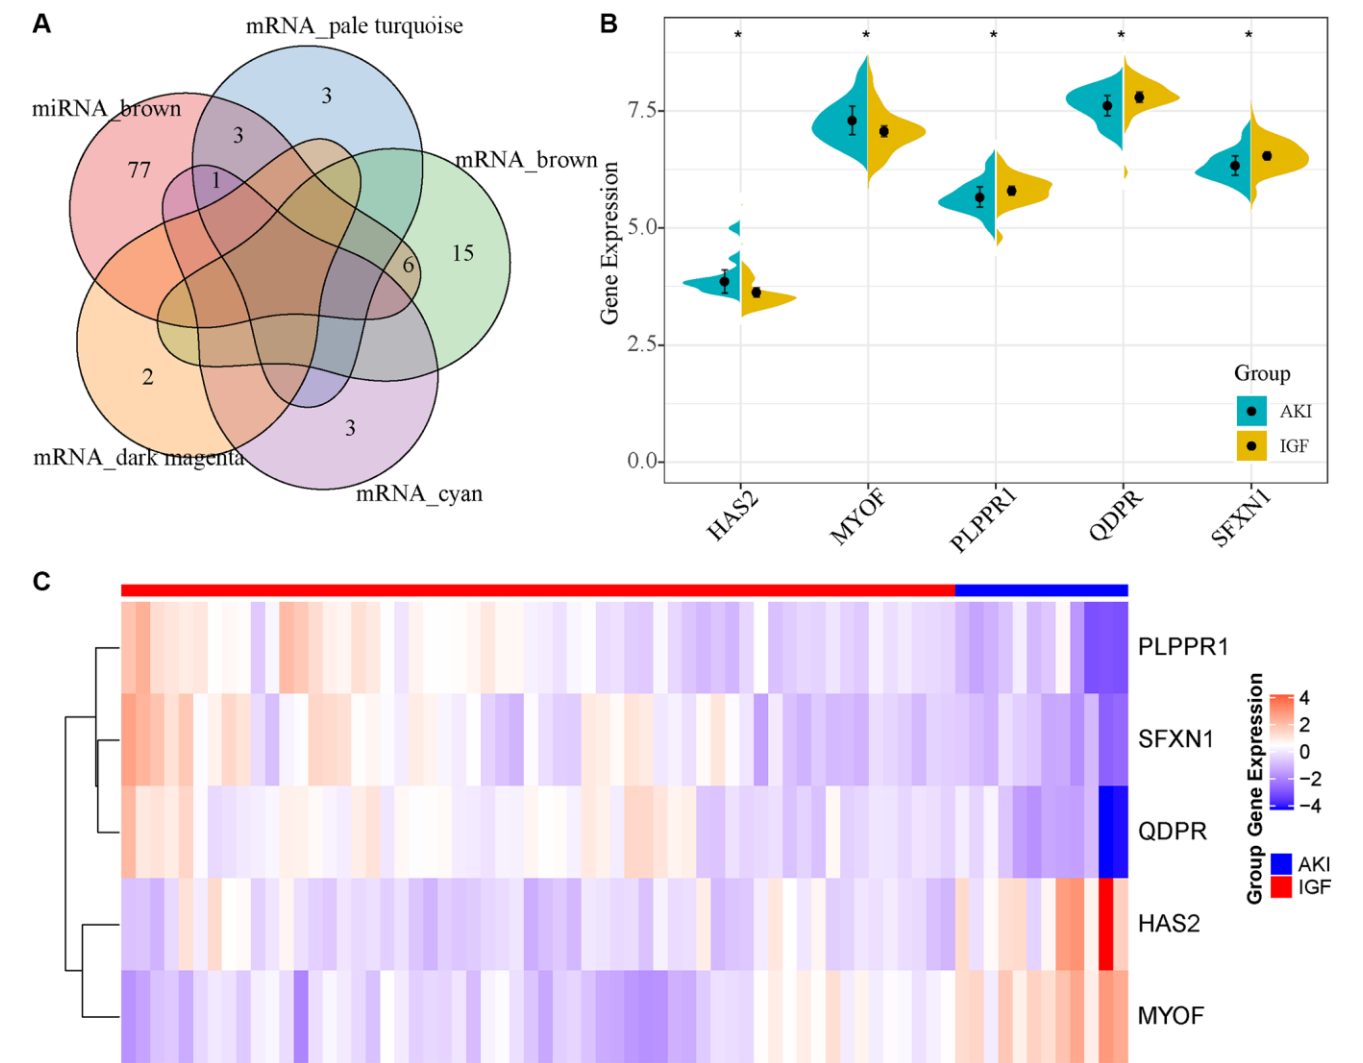

**Supplementary Figure 1. Venn diagrams and dataset validation.** (A) The phenotypic related modules were enriched into the intersection of the KEGG Pathway in the Venn diagram. (B) The expression distribution of five genes in GSE30718 dataset. (C) Heat map of expression of five genes in GSE30718 dataset.

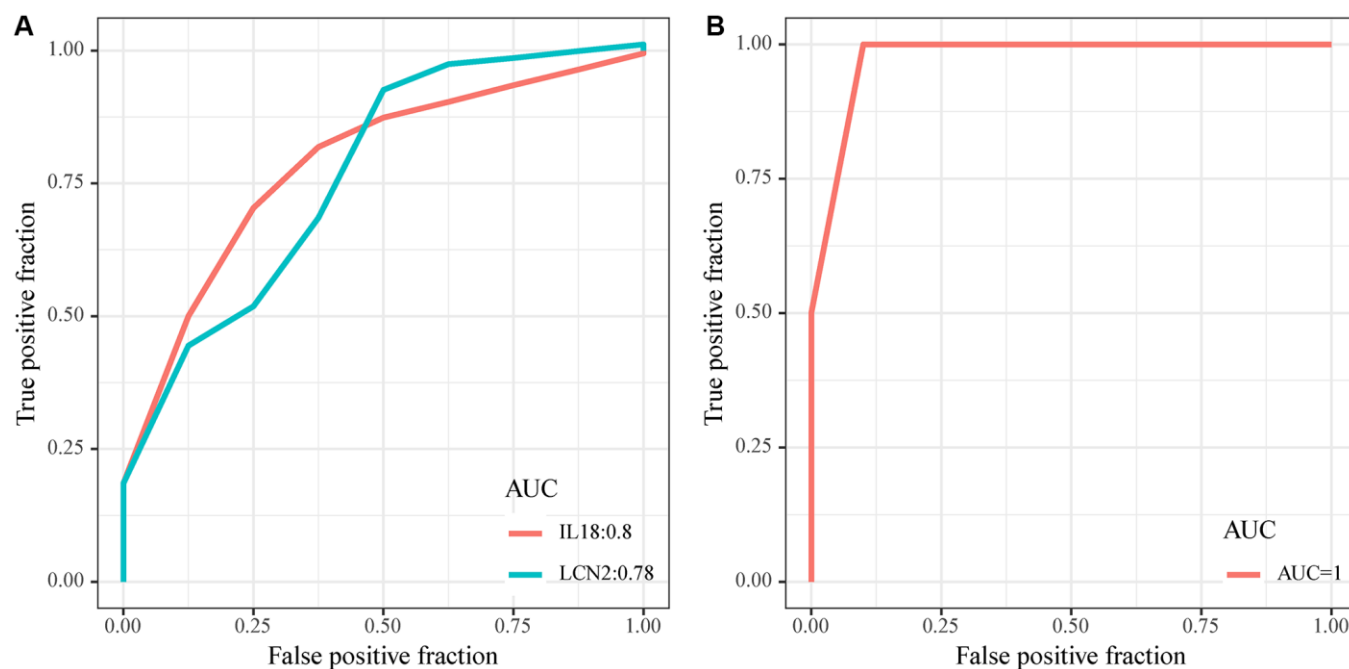

**Supplementary Figure 2. AUC analysis of NGAL and IL-18.** (A) ROC curve predicted by NGAL and IL-18 gene expression against AKI samples. (B) ROC curve of 5 gene signatures in the 0-hour sample predicted the 24-hour AKI.
