# Supplementary material for: Five-gene signature predicts acute kidney injury in early kidney transplant patients
Source: Aging (Albany NY). 2022 Mar 23;14(6):2628–44. doi: 10.18632/aging.203962 (PMC9004575; doi:10.18632/aging.203962)
Supplement: Supplementary Table 1 [file aging-14-203962-s002.xlsx]

## Sheet: Sheet1
Supplementary Table 1. Other clinical therapies in GSE30718 dataset.
Acc	Desc	Title	tissue	biopsy type	SampleName	DataSet
GSM1300286	Gene expression data from zero-hour biopsy	zero-hour biopsy 1039, biopsy pair 1039-28, AKI group	kidney	zero-hour biopsy	pair 1039-28	GSE53769
GSM1300287	Gene expression data from zero-hour biopsy	zero-hour biopsy 1047, biopsy pair 1047-02, AKI group	kidney	zero-hour biopsy	pair 1047-02	GSE53769
GSM1300288	Gene expression data from zero-hour biopsy	zero-hour biopsy 1073, biopsy pair 1073-07, AKI group	kidney	zero-hour biopsy	pair 1073-07	GSE53769
GSM1300289	Gene expression data from zero-hour biopsy	zero-hour biopsy 1084, biopsy pair 1084-09, AKI group	kidney	zero-hour biopsy	pair 1084-09	GSE53769
GSM1300290	Gene expression data from zero-hour biopsy	zero-hour biopsy 1133, biopsy pair 1133-27, PBx group (control)	kidney	zero-hour biopsy	pair 1133-27	GSE53769
GSM1300291	Gene expression data from zero-hour biopsy	zero-hour biopsy 1134, biopsy pair 1134-24, PBx group (control)	kidney	zero-hour biopsy	pair 1134-24	GSE53769
GSM1300292	Gene expression data from zero-hour biopsy	zero-hour biopsy 1135, biopsy pair 1135-25, AKI group	kidney	zero-hour biopsy	pair 1135-25	GSE53769
GSM1300293	Gene expression data from zero-hour biopsy	zero-hour biopsy 1140, biopsy pair 1140-30, PBx group (control)	kidney	zero-hour biopsy	pair 1140-30	GSE53769
GSM1300294	Gene expression data from zero-hour biopsy	zero-hour biopsy 1141, biopsy pair 1141-29, AKI group	kidney	zero-hour biopsy	pair 1141-29	GSE53769
GSM1300295	Gene expression data from zero-hour biopsy	zero-hour biopsy 1156, biopsy pair 1156-35, PBx group (control)	kidney	zero-hour biopsy	pair 1156-35	GSE53769
GSM1300296	Gene expression data from zero-hour biopsy	zero-hour biopsy 1159, biopsy pair 1159-32, PBx group (control)	kidney	zero-hour biopsy	pair 1159-32	GSE53769
GSM1300297	Gene expression data from zero-hour biopsy	zero-hour biopsy 1160, biopsy pair 1160-33, PBx group (control)	kidney	zero-hour biopsy	pair 1160-33	GSE53769
GSM1300298	Gene expression data from zero-hour biopsy	zero-hour biopsy 1161, biopsy pair 1161-34, PBx group (control)	kidney	zero-hour biopsy	pair 1161-34	GSE53769
GSM1300299	Gene expression data from zero-hour biopsy	zero-hour biopsy 1162, biopsy pair 1162-39, AKI group	kidney	zero-hour biopsy	pair 1162-39	GSE53769
GSM1300300	Gene expression data from zero-hour biopsy	zero-hour biopsy 1163, biopsy pair 1163-38, PBx group (control)	kidney	zero-hour biopsy	pair 1163-38	GSE53769
GSM1300301	Gene expression data from zero-hour biopsy	zero-hour biopsy 1171, biopsy pair 1171-41, PBx group (control)	kidney	zero-hour biopsy	pair 1171-41	GSE53769
GSM1300302	Gene expression data from zero-hour biopsy	zero-hour biopsy 1172, biopsy pair 1172-42, PBx group (control)	kidney	zero-hour biopsy	pair 1172-42	GSE53769
GSM1300303	Gene expression data from zero-hour biopsy	zero-hour biopsy 1174, biopsy pair 1174-43, AKI group	kidney	zero-hour biopsy	pair 1174-43	GSE53769
GSM1300304	Gene expression data from post-TX biopsy, protocol biopsy (PBx) without pathology	post-Tx biopsy 24, biopsy pair 1134-24, PBx group (control)	kidney	post-TX biopsy, protocol biopsy (PBx) without pathology	pair 1134-24	GSE53769
GSM1300305	Gene expression data from post-TX biopsy, acute tubular necrosis (ATN)	post-Tx biopsy 25, biopsy pair 1135-25, AKI group	kidney	post-TX biopsy, acute tubular necrosis (ATN)	pair 1135-25	GSE53769
GSM1300306	Gene expression data from post-TX biopsy, protocol biopsy (PBx) without pathology	post-Tx biopsy 27, biopsy pair 1133-27, PBx group (control)	kidney	post-TX biopsy, protocol biopsy (PBx) without pathology	pair 1133-27	GSE53769
GSM1300307	Gene expression data from post-TX biopsy, acute tubular necrosis (ATN)	post-Tx biopsy 28, biopsy pair 1039-28, AKI group	kidney	post-TX biopsy, acute tubular necrosis (ATN)	pair 1039-28	GSE53769
GSM1300308	Gene expression data from post-TX biopsy, acute tubular necrosis (ATN)	post-Tx biopsy 29, biopsy pair 1141-29, AKI group	kidney	post-TX biopsy, acute tubular necrosis (ATN)	pair 1141-29	GSE53769
GSM1300309	Gene expression data from post-TX biopsy, acute tubular necrosis (ATN)	post-Tx biopsy 02, biopsy pair 1047-02, AKI group	kidney	post-TX biopsy, acute tubular necrosis (ATN)	pair 1047-02	GSE53769
GSM1300310	Gene expression data from post-TX biopsy, protocol biopsy (PBx) without pathology	post-Tx biopsy 30, biopsy pair 1140-30, PBx group (control)	kidney	post-TX biopsy, protocol biopsy (PBx) without pathology	pair 1140-30	GSE53769
GSM1300311	Gene expression data from post-TX biopsy, protocol biopsy (PBx) without pathology	post-Tx biopsy 32, biopsy pair 1159-32, PBx group (control)	kidney	post-TX biopsy, protocol biopsy (PBx) without pathology	pair 1159-32	GSE53769
GSM1300312	Gene expression data from post-TX biopsy, protocol biopsy (PBx) without pathology	post-Tx biopsy 33, biopsy pair 1160-33, PBx group (control)	kidney	post-TX biopsy, protocol biopsy (PBx) without pathology	pair 1160-33	GSE53769
GSM1300313	Gene expression data from post-TX biopsy, protocol biopsy (PBx) without pathology	post-Tx biopsy 34, biopsy pair 1161-34, PBx group (control)	kidney	post-TX biopsy, protocol biopsy (PBx) without pathology	pair 1161-34	GSE53769
GSM1300314	Gene expression data from post-TX biopsy, protocol biopsy (PBx) without pathology	post-Tx biopsy 35, biopsy pair 1156-35, PBx group (control)	kidney	post-TX biopsy, protocol biopsy (PBx) without pathology	pair 1156-35	GSE53769
GSM1300315	Gene expression data from post-TX biopsy, protocol biopsy (PBx) without pathology	post-Tx biopsy 38, biopsy pair 1163-38, PBx group (control)	kidney	post-TX biopsy, protocol biopsy (PBx) without pathology	pair 1163-38	GSE53769
GSM1300316	Gene expression data from post-TX biopsy, acute tubular necrosis (ATN)	post-Tx biopsy 39, biopsy pair 1162-39, AKI group	kidney	post-TX biopsy, acute tubular necrosis (ATN)	pair 1162-39	GSE53769
GSM1300317	Gene expression data from post-TX biopsy, protocol biopsy (PBx) without pathology	post-Tx biopsy 41, biopsy pair 1171-41, PBx group (control)	kidney	post-TX biopsy, protocol biopsy (PBx) without pathology	pair 1171-41	GSE53769
GSM1300318	Gene expression data from post-TX biopsy, protocol biopsy (PBx) without pathology	post-Tx biopsy 42, biopsy pair 1172-42, PBx group (control)	kidney	post-TX biopsy, protocol biopsy (PBx) without pathology	pair 1172-42	GSE53769
GSM1300319	Gene expression data from post-TX biopsy, acute tubular necrosis (ATN)	post-Tx biopsy 43, biopsy pair 1174-43, AKI group	kidney	post-TX biopsy, acute tubular necrosis (ATN)	pair 1174-43	GSE53769
GSM1300320	Gene expression data from post-TX biopsy, acute tubular necrosis (ATN)	post-Tx biopsy 07, biopsy pair 1073-07, AKI group	kidney	post-TX biopsy, acute tubular necrosis (ATN)	pair 1073-07	GSE53769
GSM1300321	Gene expression data from post-TX biopsy, acute tubular necrosis (ATN)	post-Tx biopsy 09, biopsy pair 1084-09, AKI group	kidney	post-TX biopsy, acute tubular necrosis (ATN)	pair 1084-09	GSE53769
GSM1300429	microRNA expression data from zero-hour biopsy	zero-hour biopsy 1039, biopsy pair 1039-28, AKI group	kidney	zero-hour biopsy	pair 1039-28	GSE53771
GSM1300430	microRNA expression data from zero-hour biopsy	zero-hour biopsy 1047, biopsy pair 1047-02, AKI group	kidney	zero-hour biopsy	pair 1047-02	GSE53771
GSM1300431	microRNA expression data from zero-hour biopsy	zero-hour biopsy 1073, biopsy pair 1073-07, AKI group	kidney	zero-hour biopsy	pair 1073-07	GSE53771
GSM1300432	microRNA expression data from zero-hour biopsy	zero-hour biopsy 1084, biopsy pair 1084-09, AKI group	kidney	zero-hour biopsy	pair 1084-09	GSE53771
GSM1300433	microRNA expression data from zero-hour biopsy	zero-hour biopsy 1133, biopsy pair 1133-27, PBx group (control)	kidney	zero-hour biopsy	pair 1133-27	GSE53771
GSM1300434	microRNA expression data from zero-hour biopsy	zero-hour biopsy 1134, biopsy pair 1134-24, PBx group (control)	kidney	zero-hour biopsy	pair 1134-24	GSE53771
GSM1300435	microRNA expression data from zero-hour biopsy	zero-hour biopsy 1135, biopsy pair 1135-25, AKI group	kidney	zero-hour biopsy	pair 1135-25	GSE53771
GSM1300436	microRNA expression data from zero-hour biopsy	zero-hour biopsy 1140, biopsy pair 1140-30, PBx group (control)	kidney	zero-hour biopsy	pair 1140-30	GSE53771
GSM1300437	microRNA expression data from zero-hour biopsy	zero-hour biopsy 1141, biopsy pair 1141-29, AKI group	kidney	zero-hour biopsy	pair 1141-29	GSE53771
GSM1300438	microRNA expression data from zero-hour biopsy	zero-hour biopsy 1156, biopsy pair 1156-35, PBx group (control)	kidney	zero-hour biopsy	pair 1156-35	GSE53771
GSM1300439	microRNA expression data from zero-hour biopsy	zero-hour biopsy 1159, biopsy pair 1159-32, PBx group (control)	kidney	zero-hour biopsy	pair 1159-32	GSE53771
GSM1300440	microRNA expression data from zero-hour biopsy	zero-hour biopsy 1160, biopsy pair 1160-33, PBx group (control)	kidney	zero-hour biopsy	pair 1160-33	GSE53771
GSM1300441	microRNA expression data from zero-hour biopsy	zero-hour biopsy 1161, biopsy pair 1161-34, PBx group (control)	kidney	zero-hour biopsy	pair 1161-34	GSE53771
GSM1300442	microRNA expression data from zero-hour biopsy	zero-hour biopsy 1162, biopsy pair 1162-39, AKI group	kidney	zero-hour biopsy	pair 1162-39	GSE53771
GSM1300443	microRNA expression data from zero-hour biopsy	zero-hour biopsy 1163, biopsy pair 1163-38, PBx group (control)	kidney	zero-hour biopsy	pair 1163-38	GSE53771
GSM1300444	microRNA expression data from zero-hour biopsy	zero-hour biopsy 1171, biopsy pair 1171-41, PBx group (control)	kidney	zero-hour biopsy	pair 1171-41	GSE53771
GSM1300445	microRNA expression data from zero-hour biopsy	zero-hour biopsy 1172, biopsy pair 1172-42, PBx group (control)	kidney	zero-hour biopsy	pair 1172-42	GSE53771
GSM1300446	microRNA expression data from zero-hour biopsy	zero-hour biopsy 1174, biopsy pair 1174-43, AKI group	kidney	zero-hour biopsy	pair 1174-43	GSE53771
GSM1300447	microRNA expression data from post-TX biopsy, protocol biopsy (PBx) without pathology	post-Tx biopsy 24, biopsy pair 1134-24, PBx group (control)	kidney	post-TX biopsy, protocol biopsy (PBx) without pathology	pair 1134-24	GSE53771
GSM1300448	microRNA expression data from post-TX biopsy, acute tubular necrosis (ATN)	post-Tx biopsy 25, biopsy pair 1135-25, AKI group	kidney	post-TX biopsy, acute tubular necrosis (ATN)	pair 1135-25	GSE53771
GSM1300449	microRNA expression data from post-TX biopsy, protocol biopsy (PBx) without pathology	post-Tx biopsy 27, biopsy pair 1133-27, PBx group (control)	kidney	post-TX biopsy, protocol biopsy (PBx) without pathology	pair 1133-27	GSE53771
GSM1300450	microRNA expression data from post-TX biopsy, acute tubular necrosis (ATN)	post-Tx biopsy 28, biopsy pair 1039-28, AKI group	kidney	post-TX biopsy, acute tubular necrosis (ATN)	pair 1039-28	GSE53771
GSM1300451	microRNA expression data from post-TX biopsy, acute tubular necrosis (ATN)	post-Tx biopsy 29, biopsy pair 1141-29, AKI group	kidney	post-TX biopsy, acute tubular necrosis (ATN)	pair 1141-29	GSE53771
GSM1300452	microRNA expression data from post-TX biopsy, acute tubular necrosis (ATN)	post-Tx biopsy 02, biopsy pair 1047-02, AKI group	kidney	post-TX biopsy, acute tubular necrosis (ATN)	pair 1047-02	GSE53771
GSM1300453	microRNA expression data from post-TX biopsy, protocol biopsy (PBx) without pathology	post-Tx biopsy 30, biopsy pair 1140-30, PBx group (control)	kidney	post-TX biopsy, protocol biopsy (PBx) without pathology	pair 1140-30	GSE53771
GSM1300454	microRNA expression data from post-TX biopsy, protocol biopsy (PBx) without pathology	post-Tx biopsy 32, biopsy pair 1159-32, PBx group (control)	kidney	post-TX biopsy, protocol biopsy (PBx) without pathology	pair 1159-32	GSE53771
GSM1300455	microRNA expression data from post-TX biopsy, protocol biopsy (PBx) without pathology	post-Tx biopsy 33, biopsy pair 1160-33, PBx group (control)	kidney	post-TX biopsy, protocol biopsy (PBx) without pathology	pair 1160-33	GSE53771
GSM1300456	microRNA expression data from post-TX biopsy, protocol biopsy (PBx) without pathology	post-Tx biopsy 34, biopsy pair 1161-34, PBx group (control)	kidney	post-TX biopsy, protocol biopsy (PBx) without pathology	pair 1161-34	GSE53771
GSM1300457	microRNA expression data from post-TX biopsy, protocol biopsy (PBx) without pathology	post-Tx biopsy 35, biopsy pair 1156-35, PBx group (control)	kidney	post-TX biopsy, protocol biopsy (PBx) without pathology	pair 1156-35	GSE53771
GSM1300458	microRNA expression data from post-TX biopsy, protocol biopsy (PBx) without pathology	post-Tx biopsy 38, biopsy pair 1163-38, PBx group (control)	kidney	post-TX biopsy, protocol biopsy (PBx) without pathology	pair 1163-38	GSE53771
GSM1300459	microRNA expression data from post-TX biopsy, acute tubular necrosis (ATN)	post-Tx biopsy 39, biopsy pair 1162-39, AKI group	kidney	post-TX biopsy, acute tubular necrosis (ATN)	pair 1162-39	GSE53771
GSM1300460	microRNA expression data from post-TX biopsy, protocol biopsy (PBx) without pathology	post-Tx biopsy 41, biopsy pair 1171-41, PBx group (control)	kidney	post-TX biopsy, protocol biopsy (PBx) without pathology	pair 1171-41	GSE53771
GSM1300461	microRNA expression data from post-TX biopsy, protocol biopsy (PBx) without pathology	post-Tx biopsy 42, biopsy pair 1172-42, PBx group (control)	kidney	post-TX biopsy, protocol biopsy (PBx) without pathology	pair 1172-42	GSE53771
GSM1300462	microRNA expression data from post-TX biopsy, acute tubular necrosis (ATN)	post-Tx biopsy 43, biopsy pair 1174-43, AKI group	kidney	post-TX biopsy, acute tubular necrosis (ATN)	pair 1174-43	GSE53771
GSM1300463	microRNA expression data from post-TX biopsy, acute tubular necrosis (ATN)	post-Tx biopsy 07, biopsy pair 1073-07, AKI group	kidney	post-TX biopsy, acute tubular necrosis (ATN)	pair 1073-07	GSE53771
GSM1300464	microRNA expression data from post-TX biopsy, acute tubular necrosis (ATN)	post-Tx biopsy 09, biopsy pair 1084-09, AKI group	kidney	post-TX biopsy, acute tubular necrosis (ATN)	pair 1084-09	GSE53771
GSM761707		Acute kidney injury AKI 374A2AGX7		Acute kidney injury AKI		GSE30718
GSM761708		Acute kidney injury AKI 306A2AGX7		Acute kidney injury AKI		GSE30718
GSM761709		Acute kidney injury AKI 380A1AX13		Acute kidney injury AKI		GSE30718
GSM761710		Acute kidney injury AKI 95A2AGX7		Acute kidney injury AKI		GSE30718
GSM761711		Acute kidney injury AKI 220A3AGX7		Acute kidney injury AKI		GSE30718
GSM761712		Acute kidney injury AKI 513A2AGX7		Acute kidney injury AKI		GSE30718
GSM761713		Acute kidney injury AKI 255A4AGX7		Acute kidney injury AKI		GSE30718
GSM761714		Acute kidney injury AKI 397A3AGX7		Acute kidney injury AKI		GSE30718
GSM761715		Acute kidney injury AKI 289A1AGX8		Acute kidney injury AKI		GSE30718
GSM761716		Acute kidney injury AKI 82A4AGX7		Acute kidney injury AKI		GSE30718
GSM761717		Acute kidney injury AKI 281A2AGX7		Acute kidney injury AKI		GSE30718
GSM761718		Acute kidney injury AKI 332A2AGX7		Acute kidney injury AKI		GSE30718
GSM761719		Acute kidney injury AKI 337A2AGX7		Acute kidney injury AKI		GSE30718
GSM761720		Acute kidney injury AKI 338A2AGX7		Acute kidney injury AKI		GSE30718
GSM761721		Acute kidney injury AKI 366A2AGX7		Acute kidney injury AKI		GSE30718
GSM761722		Acute kidney injury AKI 406A2AGX7		Acute kidney injury AKI		GSE30718
GSM761723		Acute kidney injury AKI 116A4AGX7		Acute kidney injury AKI		GSE30718
GSM761724		Acute kidney injury AKI 292A2AGX7		Acute kidney injury AKI		GSE30718
GSM761725		Acute kidney injury AKI 72A3AGX9		Acute kidney injury AKI		GSE30718
GSM761726		Acute kidney injury AKI 128A4AGX7		Acute kidney injury AKI		GSE30718
GSM761727		Acute kidney injury AKI 126A4AGX7		Acute kidney injury AKI		GSE30718
GSM761728		Acute kidney injury AKI 49A2AGX7		Acute kidney injury AKI		GSE30718
GSM761729		Acute kidney injury AKI 49A1AGX7		Acute kidney injury AKI		GSE30718
GSM761730		Acute kidney injury AKI 47A1AGX7		Acute kidney injury AKI		GSE30718
GSM761731		Acute kidney injury AKI 24A1AGX7		Acute kidney injury AKI		GSE30718
GSM761732		Acute kidney injury AKI 60A2AGX7		Acute kidney injury AKI		GSE30718
GSM761733		Acute kidney injury AKI 56A1AGX7		Acute kidney injury AKI		GSE30718
GSM761734		Acute kidney injury AKI 56A2AGX7		Acute kidney injury AKI		GSE30718
GSM761743		pristine protocol biopsy pPB1		pristine protocol biopsy		GSE30718
GSM761744		pristine protocol biopsy pPB2		pristine protocol biopsy		GSE30718
GSM761745		pristine protocol biopsy pPB3		pristine protocol biopsy		GSE30718
GSM761746		pristine protocol biopsy pPB4		pristine protocol biopsy		GSE30718
GSM761747		pristine protocol biopsy pPB5		pristine protocol biopsy		GSE30718
GSM761748		pristine protocol biopsy pPB6		pristine protocol biopsy		GSE30718
GSM761749		pristine protocol biopsy pPB7		pristine protocol biopsy		GSE30718
GSM761750		pristine protocol biopsy pPB8		pristine protocol biopsy		GSE30718
GSM761751		pristine protocol biopsy pPB9		pristine protocol biopsy		GSE30718
GSM761752		pristine protocol biopsy pPB10		pristine protocol biopsy		GSE30718
GSM761753		pristine protocol biopsy pPB11		pristine protocol biopsy		GSE30718
